# Supplementary material
Source: PubMed Central journal article supplement (PMC11383160)
Supplement: sj-pdf-1-jfm-10.1177_1098612X13478265.pdf [file sj-pdf-1-jfm-10.1177_1098612X13478265.pdf]

## **Supplementary data**

### **Appendix 1. Sedation Score Criteria**

1. Mild sedation: alert and still very reactive to light stimulus (eg, petting), able to stand and ambulate
2. Moderate sedation: clearly sedated with minor reaction to light stimulus, unable to stand and ambulate but able to maintain sternal recumbency
3. Profound sedation: unresponsive to light stimulus but responsive to deep toe pinch and unable to maintain sternal recumbency

### **Appendix 2. Intubation Score Criteria**

1. Difficult intubation, swallowing or chewing at attempted intubation with 2 attempts necessary to intubate
2. Moderate intubation, minor chewing, coughing or swallowing, jaw and/or larynx not completely relaxed but still intubatable on first try
3. Easy intubation, no chewing, coughing or swallowing, jaw and larynx relaxed and easy intubation on first try

### **Appendix 3. Recovery Score Criteria**

1. Prolonged struggling; unable to stand without assistance; hyperkinesis in response to manual assistance; moderate to profound response to sound; clear residual effects of anesthetic
  2. Moderate struggling; repeated attempts to stand and requires assistance to stand; very unstable when walking and unable to maintain balance; moderate hyper-reactive response to sound; moderate struggling in response to manual assistance; some signs of rough recovery (ie, residual effects of anesthetic)
  3. Mild struggling; requires some assistance to stand; able to maintain balance once standing; minimal signs of residual effects of anesthetic and minimal to no hyper-reactive response to sound or manual assistance
- No struggling; assumes sternal recumbency without struggling; stands and walks with minimal effort; no signs of residual effects of anesthetic drugs and no hyper-reactive response to sound or manual assistance
